# Supplementary material
Source: publisher figshare collection journal article supplement (https://sage.figshare.com/ndownloader/files/23727731)
Supplement: Supplementary file 1 [file 23727731]

**Supplementary table 1. Management summary of top ten diagnoses**

| Top ten diagnoses      | Investigations                                                            | Treatment in primary care                                            | Examples (doses to be correlated as per BNF guidance)                                                                                                                                                                                 | Typical duration                  |
|------------------------|---------------------------------------------------------------------------|----------------------------------------------------------------------|---------------------------------------------------------------------------------------------------------------------------------------------------------------------------------------------------------------------------------------|-----------------------------------|
| <b>Eczema flare</b>    | Skin swabs (bacterial/fungal/viral) if super-added infection is suspected | Regular emollients                                                   | <i>Thick ointments e.g. Hydromol, 50:50 ointment*</i>                                                                                                                                                                                 | Unlimited                         |
|                        |                                                                           | Soap substitute                                                      | <i>Any emollient e.g. Hydromol (moisturising), Dermol 500 lotion (anti-septic)</i>                                                                                                                                                    | Unlimited                         |
|                        |                                                                           | Mild (eyelids)-Moderate (face) potency steroid                       | <i>Hydrocortisone, Eumovate ointment</i>                                                                                                                                                                                              | Up to 4-6 weeks (tapering regime) |
|                        |                                                                           | Moderate-Potent steroid (body)                                       | <i>Betnovate , Elocon ointment</i>                                                                                                                                                                                                    |                                   |
|                        |                                                                           | Very potent steroid (stubborn areas e.g. hands and feet)             | <i>Dermovate ointment</i>                                                                                                                                                                                                             |                                   |
|                        |                                                                           | Oral anti-microbial for superadded infection                         | <i>Depending on sensitivities</i>                                                                                                                                                                                                     | Usually 5-14 days                 |
| <b>Psoriasis flare</b> | Skin swabs (bacterial/fungal/viral) if super-added infection is suspected | Regular emollients                                                   | <i>Thick ointments e.g. Hydromol, 50:50 ointment*</i>                                                                                                                                                                                 | Unlimited                         |
|                        |                                                                           | Soap substitute                                                      | <i>Any emollient e.g. Hydromol (moisturising), Dermol 500 lotion (anti-septic)</i>                                                                                                                                                    | Unlimited                         |
|                        |                                                                           | Mild-moderate potency steroid (flexures and genitals)                | <i>Hydrocortisone, Eumovate ointment</i>                                                                                                                                                                                              | Up to 2 weeks                     |
|                        |                                                                           | Mild (eyelids)-Moderate (face) potency steroid                       | <i>Hydrocortisone, Eumovate ointment</i>                                                                                                                                                                                              | Up to 1-2 weeks                   |
|                        |                                                                           | Moderate potency steroid (body)                                      | <i>Betnovate RD (1/4 strength)</i>                                                                                                                                                                                                    | Up to 4 weeks (tapering regime)   |
|                        |                                                                           | Combined preparations to remove scale and reduce inflammation (body) | <i>Dovobet gel, Enstilar foam (betamethasone and calcipotriene)</i><br><i>Diprosalic ointment (betamethasone, salicylic acid)</i>                                                                                                     |                                   |
|                        |                                                                           | Oral anti-microbial for superadded infection                         | <i>Depending on sensitivities</i>                                                                                                                                                                                                     | Usually 5-14 days                 |
|                        |                                                                           | Moderate potency steroid lotion (scalp)                              | <i>Betamethasone or Mometasone scalp lotion</i>                                                                                                                                                                                       | Up to 4 weeks                     |
|                        |                                                                           | Combined scalp preparations                                          | <b><i>Sebco (coal tar, salicylic acid and sulfur mixed in coconut oil)</i></b><br><br><i>Dithrocream (dithranol, white soft paraffin*, salicylic acid)</i><br><br><i>Diprosalic scalp application (betamethasone, salicylic acid)</i> |                                   |

|                           |                                                                                                                                                                                       |                                                                                                                                                    |                                                                                                                                                                                               |                                                                                                                  |
|---------------------------|---------------------------------------------------------------------------------------------------------------------------------------------------------------------------------------|----------------------------------------------------------------------------------------------------------------------------------------------------|-----------------------------------------------------------------------------------------------------------------------------------------------------------------------------------------------|------------------------------------------------------------------------------------------------------------------|
| <b>Drug rash</b>          | Consider blood tests (e.g. FBC, Renal profile, Liver profile, CRP) if patient does not need referral<br><br>Skin swabs (bacterial/fungal/viral) if super-added infection is suspected | <b>Stop offending medication</b>                                                                                                                   |                                                                                                                                                                                               |                                                                                                                  |
|                           |                                                                                                                                                                                       | <u>If referral is not required:</u><br><br>Topical emollients and corticosteroids for relief of itch                                               | <i>Thick ointments e.g. Hydromol, 50:50 ointment*</i><br><i>Mild-moderate potency steroid for face e.g. Eumovate ointment</i><br><i>Moderate-Potent steroid for body e.g. Elocon ointment</i> | 1-4 weeks depending on severity                                                                                  |
| <b>Vasculitis</b>         | Recording blood pressure specifically<br><br>Urine dip for blood and protein,<br><br>Urine for microscopy and cytology<br><br>Blood tests (FBC, renal profile, liver profile)         | <b>Treatment of underlying cause</b><br><b>Stop any suspected offending medications</b>                                                            |                                                                                                                                                                                               |                                                                                                                  |
|                           |                                                                                                                                                                                       | <u>If referral is not required:</u><br>Rest, leg elevation and compression stockings<br><br>Topical emollients +/-moderate potency topical steroid | <i>Thick ointments e.g. Hydromol, 50:50 ointment*</i><br><i>Moderate-Potent steroid for body e.g. Elocon ointment</i>                                                                         | 1-4 weeks depending on severity                                                                                  |
| <b>Acute Urticaria</b>    | Blood tests (FBC, ESR, CRP, TSH, IgE for specific allergen)                                                                                                                           | <b>Avoidance of triggers</b>                                                                                                                       |                                                                                                                                                                                               |                                                                                                                  |
|                           |                                                                                                                                                                                       | Anti-histamines are licensed twice a day but can be used off license up to four times a day                                                        | <i>Non-sedating (e.g. cetirizine, fexofenadine, loratadine)</i><br><br><i>Sedating if itch severe at night (e.g. chlorphenamine)</i>                                                          | Up to 6 weeks<br>If rare flares, treat only during a flare<br>If persistent, daily anti-histamine for 3-6 months |
|                           |                                                                                                                                                                                       | Oral corticosteroid if severe                                                                                                                      | <i>Prednisolone 40mg</i>                                                                                                                                                                      | Up to 7 days                                                                                                     |
|                           |                                                                                                                                                                                       | Topical antipruritic treatment                                                                                                                     | <i>Calamine lotion or topical menthol 1% in aqueous cream</i>                                                                                                                                 | When required                                                                                                    |
| <b>Bullous pemphigoid</b> | Secondary care investigations (blood test and biopsy)                                                                                                                                 | Most cases will require urgent referral to secondary care<br><br>Those with widespread blistering may require admission.                           |                                                                                                                                                                                               |                                                                                                                  |
| <b>Tinea Capita</b>       | Both skin scrapings and plucked hair                                                                                                                                                  | <b>Self-care (advise not to share towels, soften crust with moisturiser, discard objects that may transmit fungal spores e.g. hat)</b>             |                                                                                                                                                                                               |                                                                                                                  |

|                             |                                                                                                                  |                                                                                                                                                                                                                                                      |                                                                                                                                                                                                                                                                                                |                                                                                        |
|-----------------------------|------------------------------------------------------------------------------------------------------------------|------------------------------------------------------------------------------------------------------------------------------------------------------------------------------------------------------------------------------------------------------|------------------------------------------------------------------------------------------------------------------------------------------------------------------------------------------------------------------------------------------------------------------------------------------------|----------------------------------------------------------------------------------------|
|                             | follicles should be sent for <b>mycology</b><br><br><b>Suspected kerion should be referred to secondary care</b> | Oral antifungals                                                                                                                                                                                                                                     | <i>If sensitivities are available treat based on results</i><br><br><i>Urban area : oral terbinafine (off-label)</i><br><br><i>Rural area: oral griseofulvin (licensed)</i><br><br><i>Consider itraconazole (off-label indication) if griseofulvin is not tolerated or is contraindicated.</i> | 4 weeks<br><br>4-8 weeks<br><br>4 weeks                                                |
| <b>Herpes Zoster</b>        | Clinical diagnosis                                                                                               | <b>Infection control advice</b>                                                                                                                                                                                                                      |                                                                                                                                                                                                                                                                                                |                                                                                        |
|                             | Skin swab for virus to confirm diagnosis (and bacteria if super-added infection suspected)                       | <u>If patients do not require hospital admission and present within 72 hours:</u><br><br>Consider oral anti-viral treatment if any:<br><br>-Immunocompromised<br>-Non-truncal site<br>-Moderate-severe pain<br>-Moderate-severe rash<br>-Age over 50 | <i>Aciclovir, Valaciclovir, Famciclovir</i>                                                                                                                                                                                                                                                    | Immunocompetent: 7 days<br><br>Immunocompromised: for 2 days after crusting of lesions |
|                             |                                                                                                                  | Analgesia                                                                                                                                                                                                                                            | <i>Paracetamol, NSAIDs</i><br><i>If not effective: consider amitriptyline (off-label use), duloxetine (off-label use), gabapentin, or pregabalin.</i>                                                                                                                                          | Depending on duration of pain                                                          |
| <b>Erythema multiforme</b>  | Clinical diagnosis<br><br>Viral swab to identify HSV (most common cause)                                         | Most cases will require referral to a specialist<br>Mucosal and eye involvement should prompt same-day admission                                                                                                                                     |                                                                                                                                                                                                                                                                                                |                                                                                        |
| <b>Dermatitis Artefacta</b> | Clinical diagnosis                                                                                               | Most cases will require referral to a specialist                                                                                                                                                                                                     |                                                                                                                                                                                                                                                                                                |                                                                                        |

*\*Paraffin-based emollients can act as fire accelerants. Advise patients who use these products not to smoke or go near naked flames, and warn about the easy ignition of clothing, bedding, dressings, and other fabric that have dried residue of an emollient product on them.*
